# Supplementary material
Source: HighWire-hosted journal article supplement (https://bmjopen.bmj.com/content/8/6/e022260)
Supplement: inline-supplementary-material-4 [file inline-supplementary-material-4.pdf]

#### Appendix 4: Table of themes

| Overarching themes                        | Sub themes                                                                                                                                                                                   |
|-------------------------------------------|----------------------------------------------------------------------------------------------------------------------------------------------------------------------------------------------|
| 1. Behaviours expressing unmet need       | 1.1 Unmet physical need<br>1.2 Unmet emotional need<br>1.3 Unmet environmental need                                                                                                          |
| 2. Staff emotional responses to agitation | 2.1 Feeling powerless and disheartened<br>2.2 Feeling frightened<br>2.3 Trying not to react                                                                                                  |
| 3. Understanding the individual helps     | 3.1 Seeing the person not the disease<br>3.2 Connecting with previously valued identities<br>3.3 Playing along with rather than correcting<br>3.4 Making people feel comfortable and at home |
| 4. Constraints on staff responses         | 4.1 Procedural constraints<br>4.2 Structural constraints<br>4.3 Support and training<br>4.4 Culture of fear and scrutiny                                                                     |
